# Supplementary material for: Non-Alcoholic Fatty Liver Disease and Echocardiographic Parameters of Left Ventricular Diastolic Function: A Systematic Review and Meta-Analysis
Source: MDPI journal article supplement (doi:10.3390/ijms241814292), 2023-09-19
Supplement: s1 [file s1]

**Supplementary Figure S1.** Exclusion of any single study using the leave-one-out method did not alter the results of the meta-analysis concerning diastolic dysfunction in patients with and without NAFLD. The leave-one-out sensitivity analysis ordered by effect size ( $\theta$ ) was performed, with  $I^2$  representing between-study heterogeneity and horizontal error bars denoting the 95% confidence intervals.

**Supplementary Figure S2.** Exclusion of any single study using the leave-one-out method did not alter the results of the meta-analysis concerning E/e' in patients with and without NAFLD. The leave-one-out sensitivity analysis ordered by effect size ( $\theta$ ) was performed, with  $I^2$  representing between-study heterogeneity and horizontal error bars denoting the 95% confidence intervals.

**Supplementary Figure S3.** Inspection of the funnel plot of studies assessing E/e' in patients with and without NAFLD indicates asymmetry, potentially caused by publication bias. Hedges' g was used as the effect size metric.

**Supplementary Figure S4.** Exclusion of any single study using the leave-one-out method did not alter the results of the meta-analysis concerning LAVi in patients with and without NAFLD. The leave-one-out sensitivity analysis ordered by effect size ( $\theta$ ) was performed, with  $I^2$  representing between-study heterogeneity and horizontal error bars denoting the 95% confidence intervals.

**Supplementary Figure S5.** Inspection of the symmetric funnel plot of studies assessing LAVi in patients with and without NAFLD. Hedges' g was used as the effect size metric.

**Supplementary Figure S6.** Inspection of the symmetric funnel plot of studies assessing LVMI in patients with and without NAFLD. Hedges' g was used as the effect size metric.
