# Supplementary material for: Non-Alcoholic Fatty Liver Disease and Echocardiographic Parameters of Left Ventricular Diastolic Function: A Systematic Review and Meta-Analysis
Source: Int J Mol Sci. 2023 Sep 19;24(18):14292. doi: 10.3390/ijms241814292 (PMC10532416; doi:10.3390/ijms241814292)
Supplement: Supplementary file 1 [file ijms-24-14292-s001.zip]

Archive with 7 entries (7 files):
- Supplementary Figure legend.pdf
- Supplementary Figure S1.jpeg
- Supplementary Figure S2.jpeg
- Supplementary Figure S3.jpeg
- Supplementary Figure S4.jpeg
- Supplementary Figure S5.jpeg
- Supplementary Figure S6.jpeg
